# Supplementary material for: Fuzzy logic selection as a new reliable tool to identify molecular grade signatures in breast cancer – the INNODIAG study
Source: PubMed Central journal article supplement (PMC4342216; doi:10.1186/s12920-015-0077-1), 2015-02-07
Supplement: 12920_2015_77_MOESM4_ESM.pdf [file 12920_2015_77_MOESM4_ESM.pdf]

**fuzzy Gene signature A**

|      |    |                       |         |
|------|----|-----------------------|---------|
| NKI2 | 93 | 1.406 (1.004 - 1.969) | p<0.043 |
|------|----|-----------------------|---------|

**fuzzy Gene signature B**

|           |     |                       |                          |
|-----------|-----|-----------------------|--------------------------|
| Pool      | 309 | 1.76 (1.46 - 2.11)    | p<0.0001                 |
| KJ125     | 63  | 1.72 (1.137 - 2.602)  | p<0.0073                 |
| Uppsala   | 126 | 1.553 (1.166 - 2.068) | p<0.002                  |
| Transbig  | 83  | 1.984 (1.466 - 2.685) | p<1.94x10 <sup>-06</sup> |
| Stockholm | 58  | 1.809 (1.046 - 3.128) | p<0.0249                 |

**fuzzy Gene signature C**

|           |     |                       |                         |
|-----------|-----|-----------------------|-------------------------|
| Pool      | 184 | 1.687 (1.311 - 2.171) | p<2.1x10 <sup>-05</sup> |
| Uppsala   | 126 | 1.571 (1.18 - 2.092)  | p<0.00139               |
| Stockholm | 58  | 2.128 (1.231 - 3.677) | p<0.004                 |

**fuzzy Gene signature D**

|           |     |                       |          |
|-----------|-----|-----------------------|----------|
| Pool      | 309 | 1.53 (1.27 - 1.83)    | p<0.0001 |
| KJ125     | 63  | 1.581 (1.052 - 2.376) | p<0.0229 |
| Uppsala   | 126 | 1.431 (1.071 - 1.911) | p<0.0135 |
| Transbig  | 83  | 1.497 (1.085 - 2.064) | p<0.0117 |
| Stockholm | 58  | 1.587 (0.888 - 2.837) | p=0.107  |

---
