# Supplementary material for: Fuzzy logic selection as a new reliable tool to identify molecular grade signatures in breast cancer – the INNODIAG study
Source: PubMed Central journal article supplement (PMC4342216; doi:10.1186/s12920-015-0077-1), 2015-02-07
Supplement: 12920_2015_77_MOESM5_ESM.pdf [file 12920_2015_77_MOESM5_ESM.pdf]

| Comparison                      | Univariate analysis |             | Multivariable analysis |            |
|---------------------------------|---------------------|-------------|------------------------|------------|
|                                 | HR (95% CI) †       | P‡          | HR (95% CI) †          | P‡         |
| <b>Age</b>                      |                     |             |                        |            |
| =< 50 vs > 50                   | 0.89 (0.69 to 1.16) | p=0.3996    | 0.86 (0.65 to 1.14)    | p=0.283865 |
| <b>Histological Grade</b>       |                     |             |                        |            |
| G2 + G3 vs G1                   | 1.93 (1.37 to 2.73) | p=8.702e-05 | 1.31 (0.89 to 1.93)    | p=0.374097 |
| G3 vs G1 + G2                   | 1.45 (1.11 to 1.90) |             | 0.65 (0.46 to 0.92)    |            |
| <b>Estrogen receptor status</b> |                     |             |                        |            |
| positive vs negative            | 0.75 (0.56 to 1.01) | p=0.05596   | 1.12 (0.80 to 1.57)    | p=0.498064 |
| <b>Lymphome node status</b>     |                     |             |                        |            |
| positive vs negative            | 1.54 (1.12 to 2.12) | p=0.007772  | 1.39 (0.99 to 1.96)    | p=0.05691  |
| <b>Tumor size</b>               |                     |             |                        |            |
| >2 cm vs =< 2 cm                | 1.92 (1.48 to 2.49) | p=1.074e-06 | 1.64 (1.24 to 2.17)    | p=0.000479 |
| <b>fGS B</b>                    |                     |             |                        |            |
| G1 vs G3                        | 1.53 (1.35 to 1.74) | p=1.309e-10 | 1.51 (1.21 to 1.88)    | p=0.000320 |

† HR = hazard ratio for recurrence; CI = confidence interval.

‡ P. Value based on Cox regression.
