# Supplementary material for: Fuzzy logic selection as a new reliable tool to identify molecular grade signatures in breast cancer – the INNODIAG study
Source: PubMed Central journal article supplement (PMC4342216; doi:10.1186/s12920-015-0077-1), 2015-02-07
Supplement: 12920_2015_77_MOESM6_ESM.pdf [file 12920_2015_77_MOESM6_ESM.pdf]

| <i>fuzzy Gene signature</i> | Molecular grade | Histologic grade |              |           |              |    |       |
|-----------------------------|-----------------|------------------|--------------|-----------|--------------|----|-------|
|                             |                 | G1               |              | G3        |              | G2 |       |
|                             |                 | n                | %            | n         | %            | n  | %     |
| <i>fGS A</i>                | G1              | <b>14</b>        | <b>(78%)</b> | 5         | (7%)         | 33 | (57%) |
|                             | G3              | 4                | (22%)        | <b>69</b> | <b>(93%)</b> | 25 | (43%) |
| <i>fGS B</i>                | G1              | <b>17</b>        | <b>(94%)</b> | 3         | (4%)         | 37 | (64%) |
|                             | G3              | 1                | (6%)         | <b>71</b> | <b>(96%)</b> | 21 | (36%) |
| <i>fGS C</i>                | G1              | <b>14</b>        | <b>(78%)</b> | 3         | (4%)         | 23 | (40%) |
|                             | G3              | 4                | (22%)        | <b>71</b> | <b>(96%)</b> | 35 | (60%) |
| <i>fGS D</i>                | G1              | <b>17</b>        | <b>(94%)</b> | 4         | (5%)         | 31 | (53%) |
|                             | G3              | 1                | (6%)         | <b>70</b> | <b>(95%)</b> | 27 | (47%) |
